# Supplementary material
Source: PubMed Central journal article supplement (PMC3132226)
Supplement: NIHMS286511-supplement-2.pdf [file NIHMS286511-supplement-2.pdf]

# Alpha cells secrete acetylcholine as a non-neuronal paracrine signal priming human beta cell function

Rayner Rodriguez-Diaz, Robin Dando, M. Caroline Jacques-Silva, Alberto Fachado, Judith Molina, Midhat Abdulreda, Camillo Ricordi, Stephen D. Roper, Per-Olof Berggren, Alejandro Caicedo

## Supplementary Information

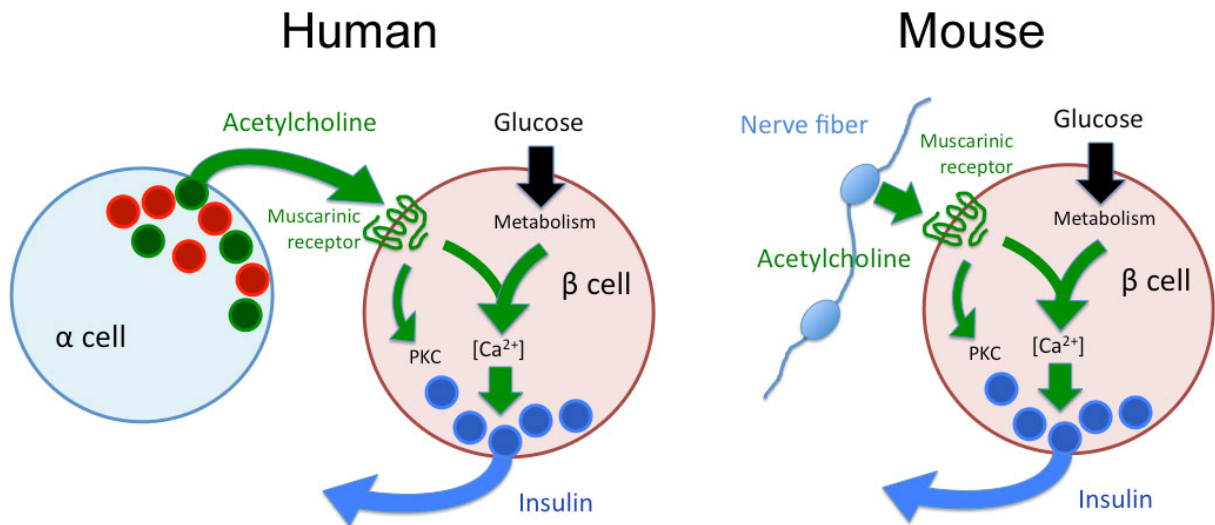

**Supplementary Figure 1** Graphical representation of the results.

In human alpha cells, acetylcholine is stored in vesicles for exocytotic release (green). Glucagon is stored in different granules (red). Alpha cell-derived acetylcholine amplifies beta cell secretion in response to increases in glucose. By contrast, in mouse islets, parasympathetic fibers provide cholinergic input to beta cells.

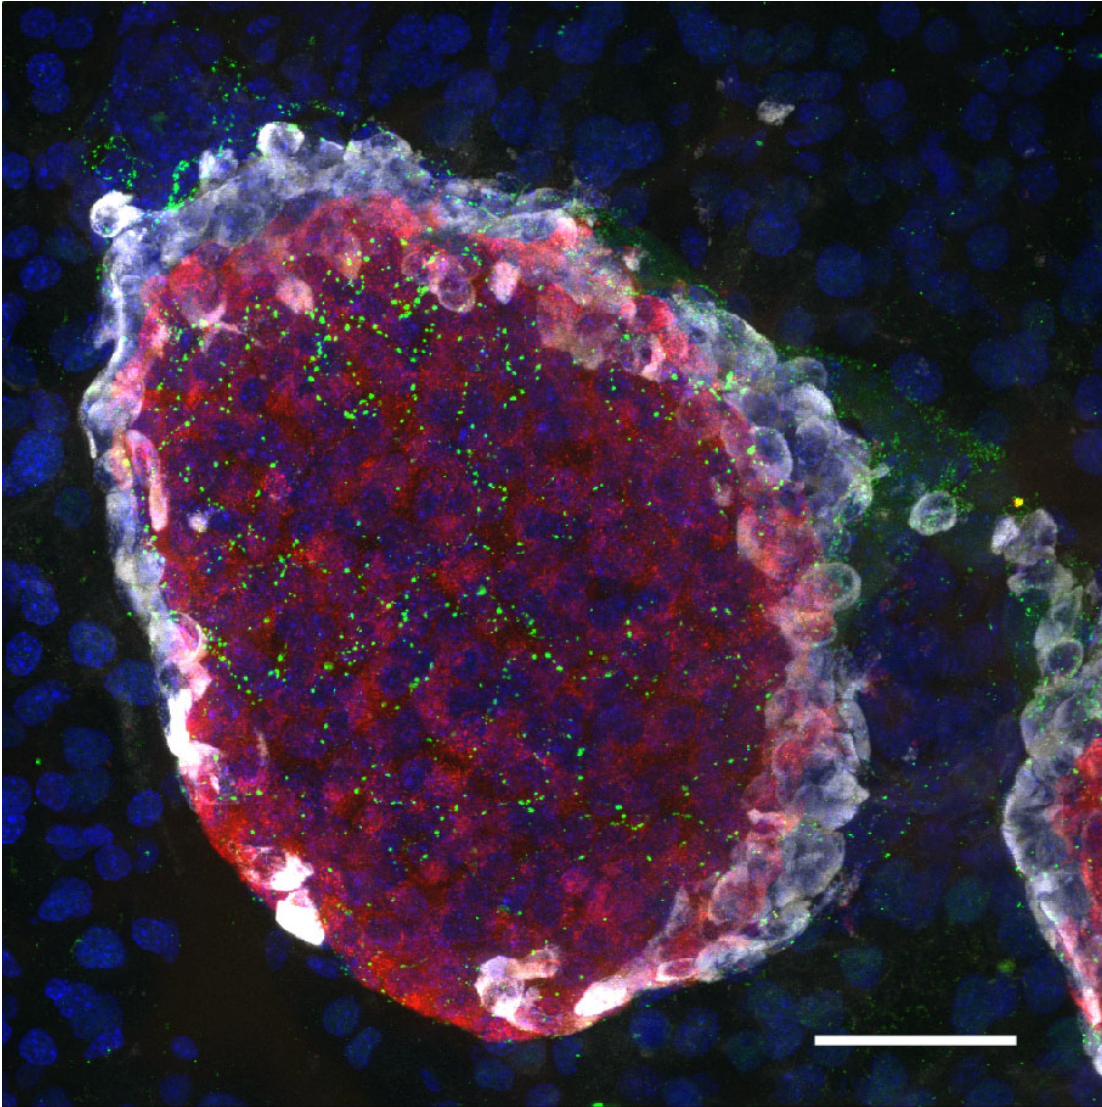

**Supplementary Figure 2** Cholinergic fibers innervate beta cells in the mouse islet.

Z-stack of confocal images of a mouse pancreatic section showing an islet immunostained for vesicular acetylcholine transporter (vAChT, green), glucagon (white), and insulin (red). Scale bar, 50  $\mu\text{m}$ .

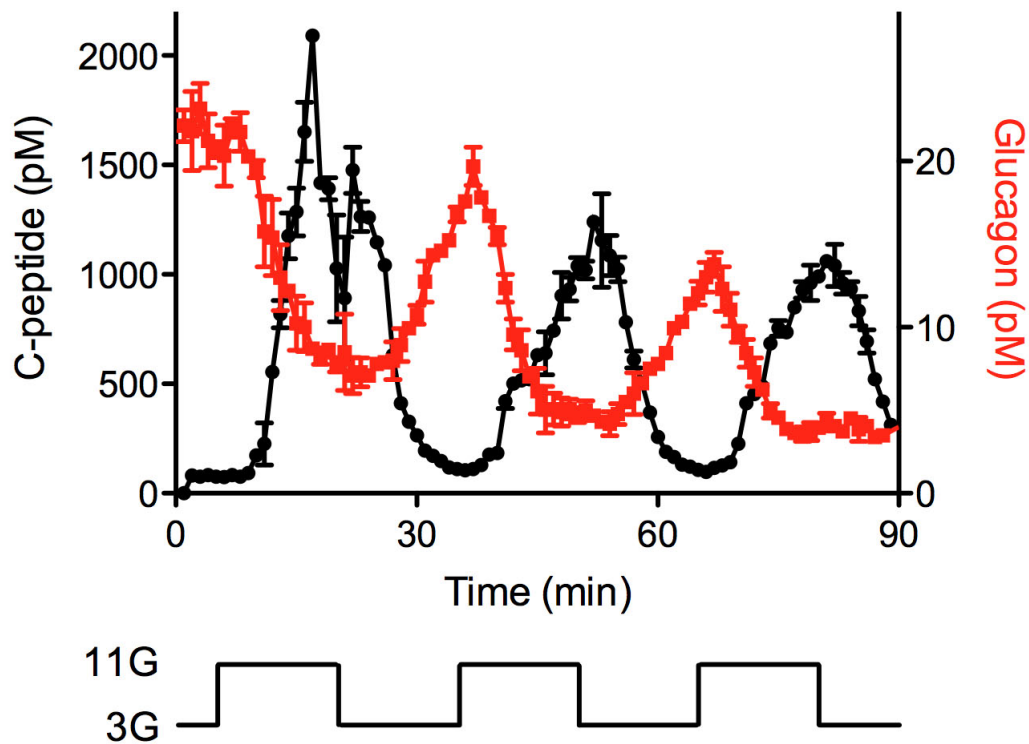

**Supplementary Figure 3** Stimulation protocol used to alternately stimulate alpha and beta cells.

In perfusion assays of dynamic secretory responses, the glucose concentration was made to fluctuate between 3 mM (3G) and 11 mM (11G). This stimulation pattern resulted in alternate activation of beta cells (increases in C-peptide secretion; black symbols) and alpha cells (increases in glucagon secretion; red symbols). This stimulation protocol was used for the experiments shown in Fig. 4c, d ( $n = 4$  islet preparations).
